# Supplementary material for: Recovery of Carbon and Vegetation Diversity 23 Years after Fire in a Tropical Dryland Forest of Indonesia
Source: MDPI journal article supplement (doi:10.3390/su14126964), 2022-06-07
Supplement: s1 [file s1]

Archive with 1 entries (1 files):
- sustainability-1698650-supplementary.pdf
