# Supplementary material for: Recovery of Carbon and Vegetation Diversity 23 Years after Fire in a Tropical Dryland Forest of Indonesia
Source: MDPI journal article supplement (doi:10.3390/su14126964), 2022-06-07
Supplement: s1 [file s1 › sustainability-1698650-supplementary.pdf]

**Figure S1.** Elevation of Bangkirai hills forest (m).

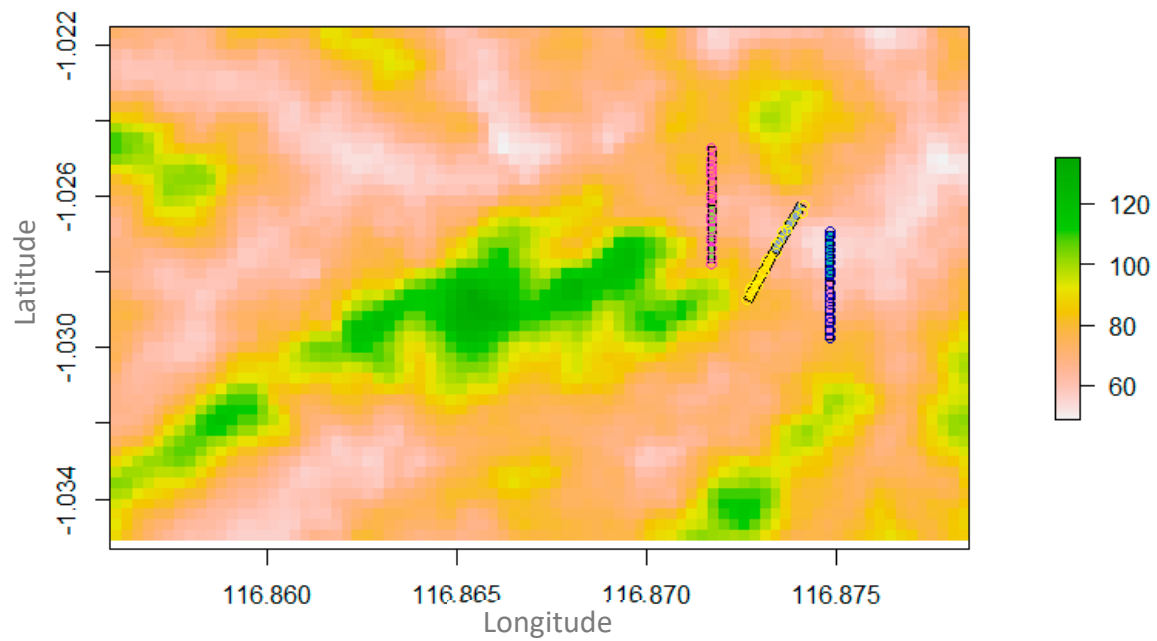

**Figure S2.** NOAA-AVHRR hotspots, acquired in March 1998, at East Kalimantan, Indonesia.

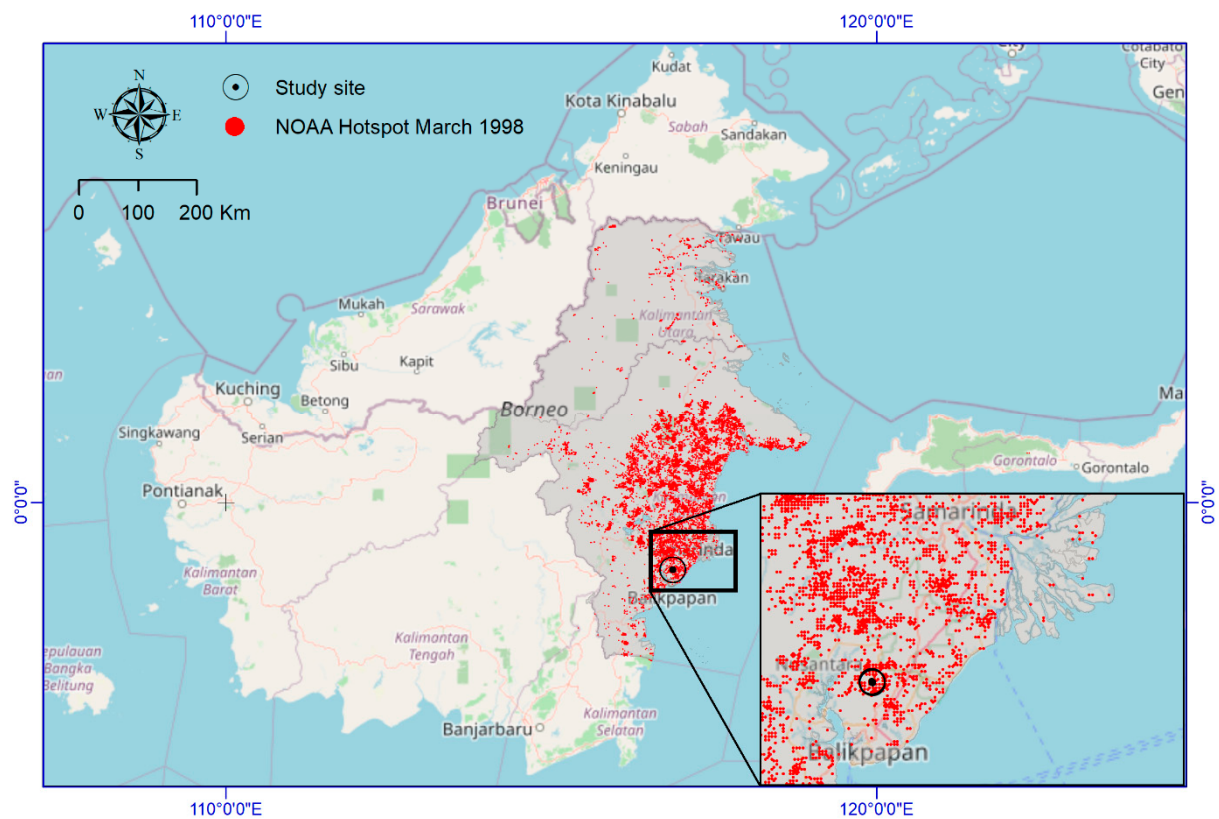

**Figure S3.** Climate of Bangkirai hills forest : (a) Precipitation, (b) Temperature.

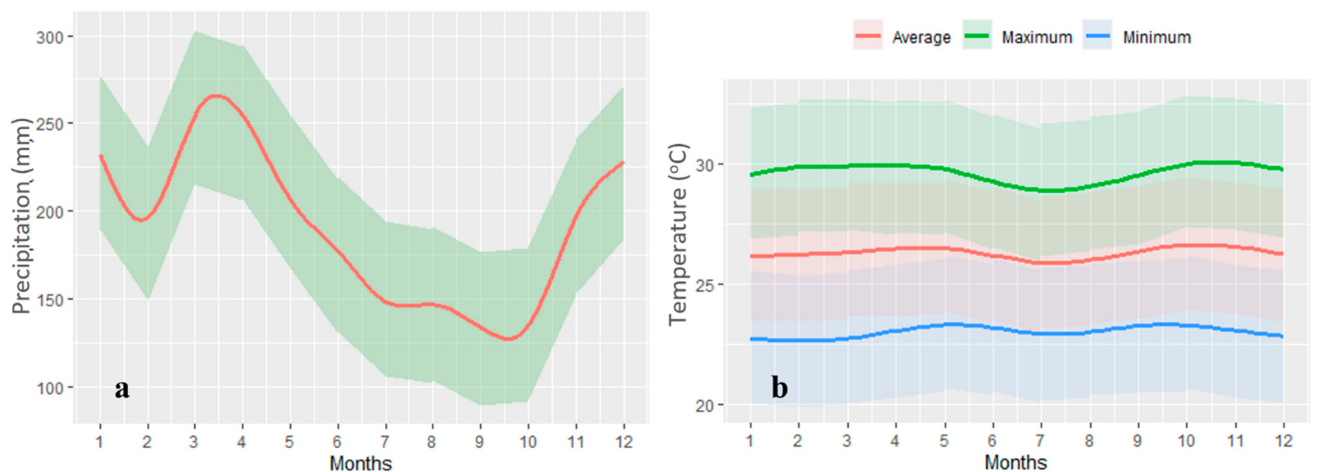

**Figure S4.** Histogram of the time recovery estimate after fire based on Monte Carlo simulation ( $n = 5000$ ).

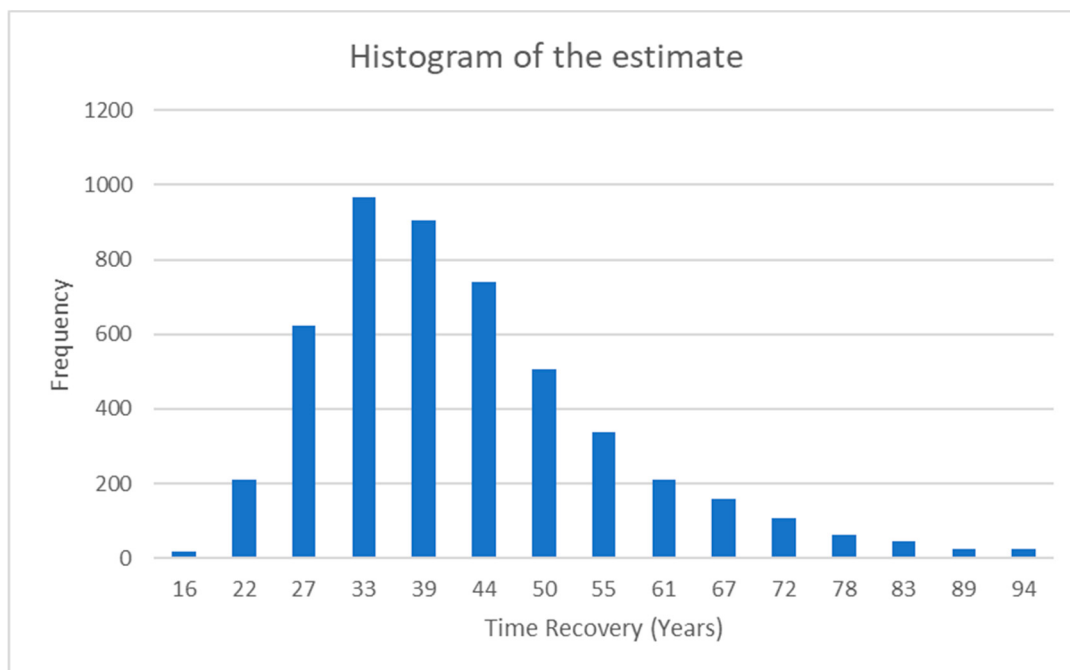

Noted: Time recovery estimate after fire based on Monte Carlo simulation ( $n = 5,000$ ) with the input of parameters: AGB unburned forest  $265.30 \pm 34.16 \text{ Mg ha}^{-1}$ , MAI AGB of forest regrowth  $6.24 \pm 1.59 \text{ Mg ha}^{-1} \text{ yr}^{-1}$ , and data follows a normal distribution.
